# Supplementary material for: Polycomb directs timely activation of germline genes in spermatogenesis
Source: PubMed Central journal article supplement — Genes Dev. 2017 Aug 15;31(16):1693–703. doi: 10.1101/gad.302000.117 (PMC5647939; doi:10.1101/gad.302000.117), 2017-08-15
Supplement: supp_gad.302000.117_Supplemental_Data.pdf [file supp_gad.302000.117_Supplemental_Data.pdf]

## **Supplemental Data**

**Supplemental Figure S1. Localization of RNF2 in spermatogenesis.**

**Supplemental Figure S2. Spermatogenic phenotypes of PRC1cKO testes.**

**Supplemental Figure S3. Increased apoptosis in spermatogonia of PRC1cKO testes.**

**Supplemental Figure S4. Gene ontology analysis and examples of differentially expressed genes in PRC1cKO spermatogonia.**

**Supplemental Figure S5. Retrotransposons were not derepressed in PRC1cKO spermatogonia.**

**Supplemental Figure S6. Occupancy Input, H2AK119ub, and BMI1 around TSSs in wild-type GS cells.**

**Supplemental Figure S7. Localization of SALL4 and RNF2 during spermatogenesis.**

**Supplemental Figure S8. ChIP-seq enrichment and gene expression profiles of 6 clusters of genes identified by k-means clustering.**

### **Antibody list**

#### **Supplemental Table 1 (separate file)**

This table contains the gene list of PRC1-regulated genes based on RNA-seq analysis. This list also contains RNA-seq reads and *P*-values between PRC1ctrl and PRC1cKO at Thy1<sup>+</sup> spermatogonia and c-Kit<sup>+</sup> spermatogonia.

#### **Supplemental Table 2 (separate file)**

This table contains the gene list of each cluster identified by k-means clustering analysis of PRC1-regulated genes based on ChIP-seq analysis. This list also contains ChIP-seq reads ( $\pm 2$  kb around TSS) in GS cells (RNF2, BMI1, H2Ak119ub) and cultured Thy1<sup>+</sup> spermatogonia (SALL4).

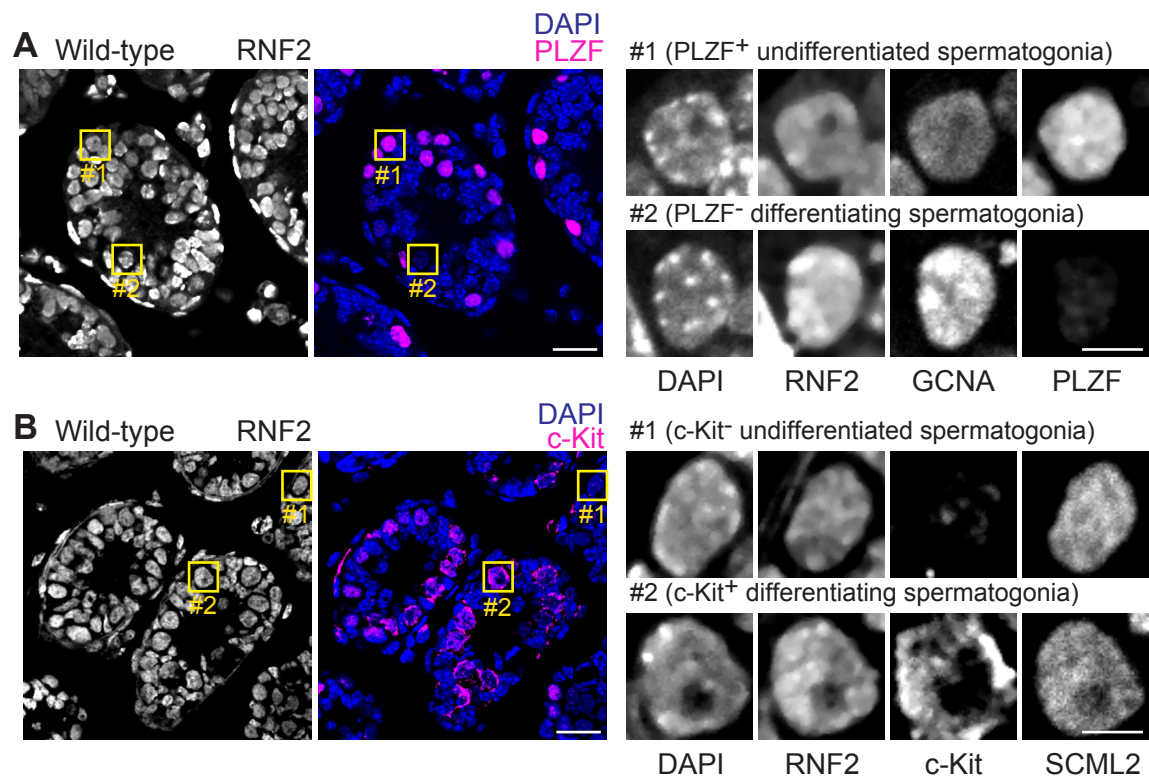

**Supplemental Figure S1. Localization of RNF2 in spermatogenesis.**

(A, B) Immunostaining of testicular sections at P7. Scale bars, 20  $\mu\text{m}$ . The regions with yellow squares are magnified in panels shown on the right. Scale bars in magnified panels, 5  $\mu\text{m}$ .

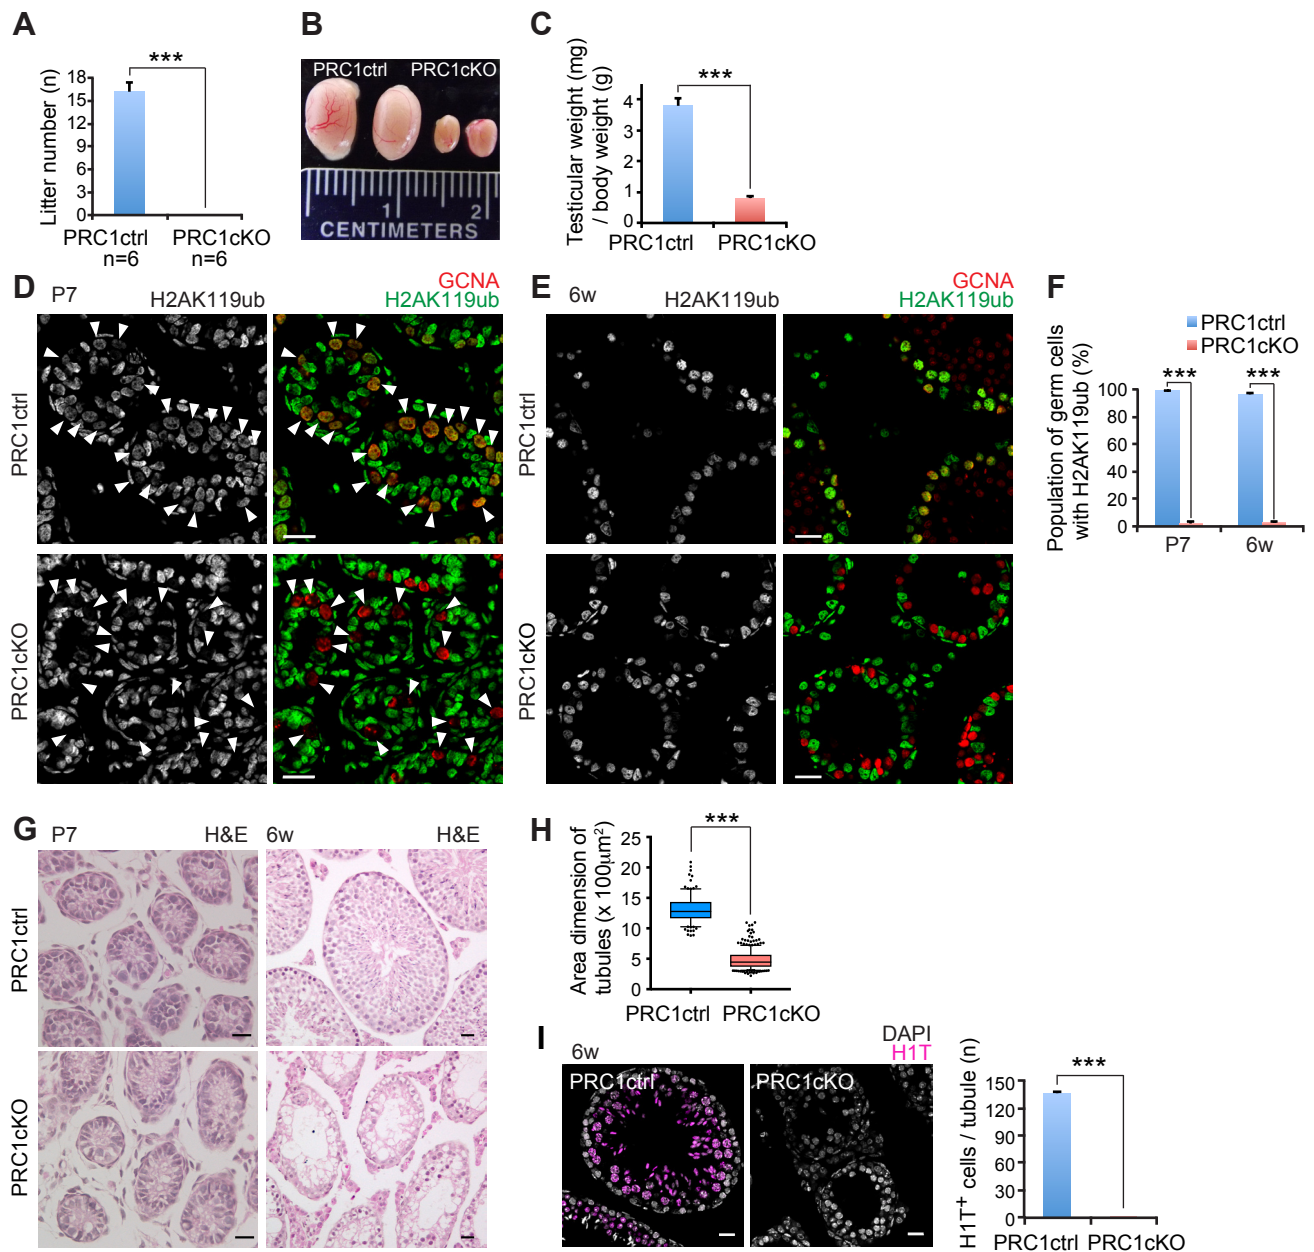

### Supplemental Figure S2. Spermatogenic phenotypes of PRC1cKO testes.

(A) Litter sizes when PRC1ctrl or PRC1cKO males were mated with wild-type females. Data are represented as mean  $\pm$  s.e.m. Six independent mice were examined. (B) Picture of PRC1ctrl and PRC1cKO testes at 6 months. (C) Testicular weight per body weight of adult testes at the ages of 2-9 months. Data are represented as mean  $\pm$  s.e.m. Five and four independent mice were scored for the PRC1ctrl and PRC1cKO, respectively. (D, E) Immunostaining of H2AK119ub and GCNA, a germ cell marker, in testicular sections at postnatal day 7 (P7) and at 6 weeks old (6w). GCNA-positive cells are shown with arrowheads. Scale bar, 20  $\mu$ m. (F) Quantitative data of the percentage of germ cells with H2AK119ub at P7 and 6w. Data are represented as the mean  $\pm$  s.e.m. Three independent mice were examined for each time point. (G) Histological testicular sections stained with hematoxylin and eosin. Scale bars, 20  $\mu$ m. (H) Area dimension of tubules in testes at 6 weeks. Center bars are medians; bottom and top bars are, respectively, 10% and 90% of data points; and bottom and top boxes are, respectively, 25% and 75% of data points. Three independent mice were examined. (I) Immunostaining of H1T in testicular sections at 6 weeks. Scale bars, 20  $\mu$ m. Quantitative data are shown in right-hand panels. Data are represented as mean  $\pm$  s.e.m. Three independent mice were examined for each antibody. \*\*\*  $P < 0.0001$ , unpaired t-test.

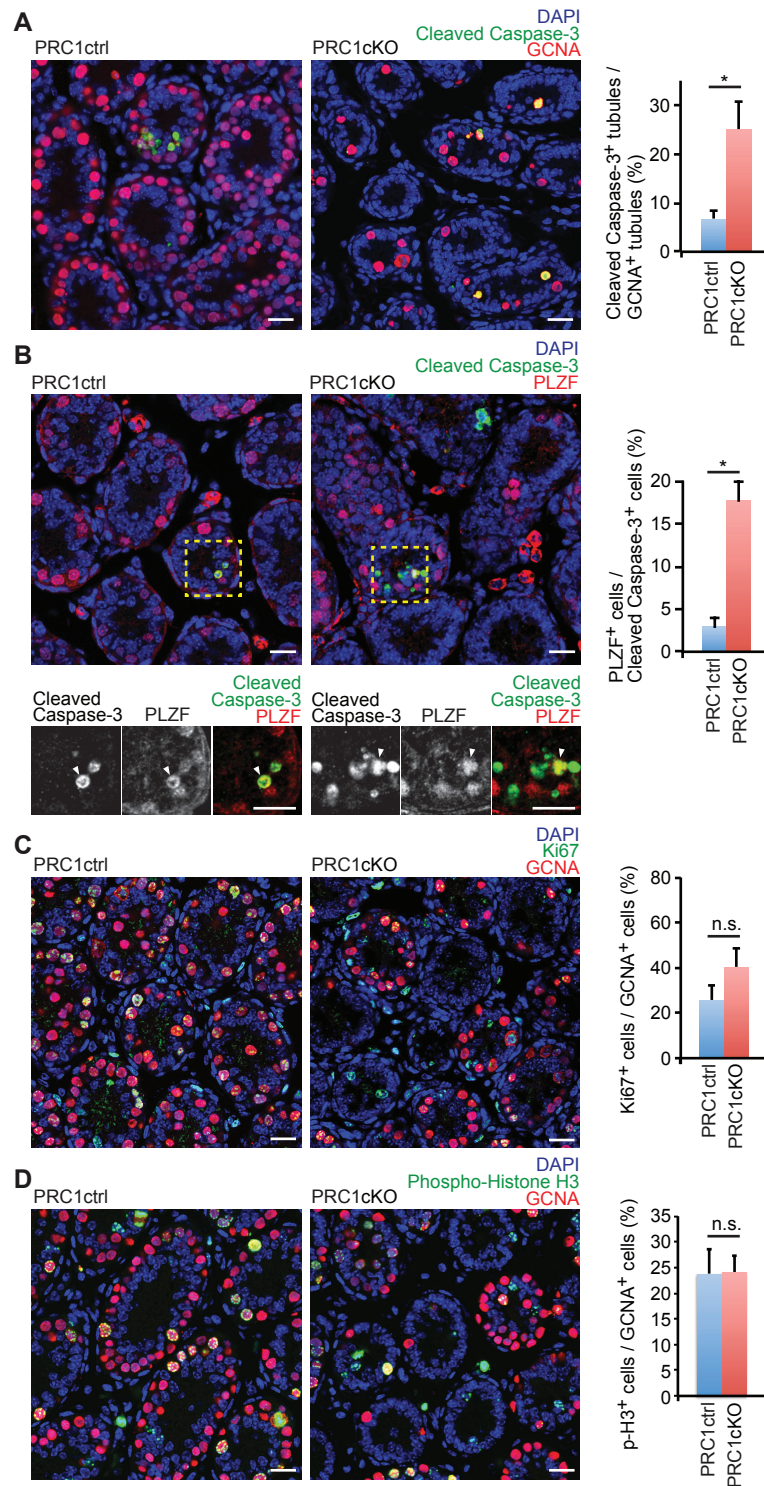

**Supplemental Figure S3. Increased apoptosis in spermatogonia of PRC1cKO testes.**

(A, B) Immunostaining of testicular sections at P7. Cleaved Caspase-3 is an apoptosis marker, GCNA is a germ-cell marker, and PLZF is an undifferentiated spermatogonia marker. Scale bars, 20  $\mu$ m. Quantitative data are shown in right-hand panels. Data are represented as mean  $\pm$  s.e.m. Three independent mice were examined. \*  $P < 0.05$ , unpaired t-test. (C, D) Immunostaining of testicular sections at P7. Scale bars, 20  $\mu$ m. Quantitative data are shown in right-hand panels. Three independent mice were examined. Data are represented as mean  $\pm$  s.e.m. n.s. not significant, unpaired t-test.

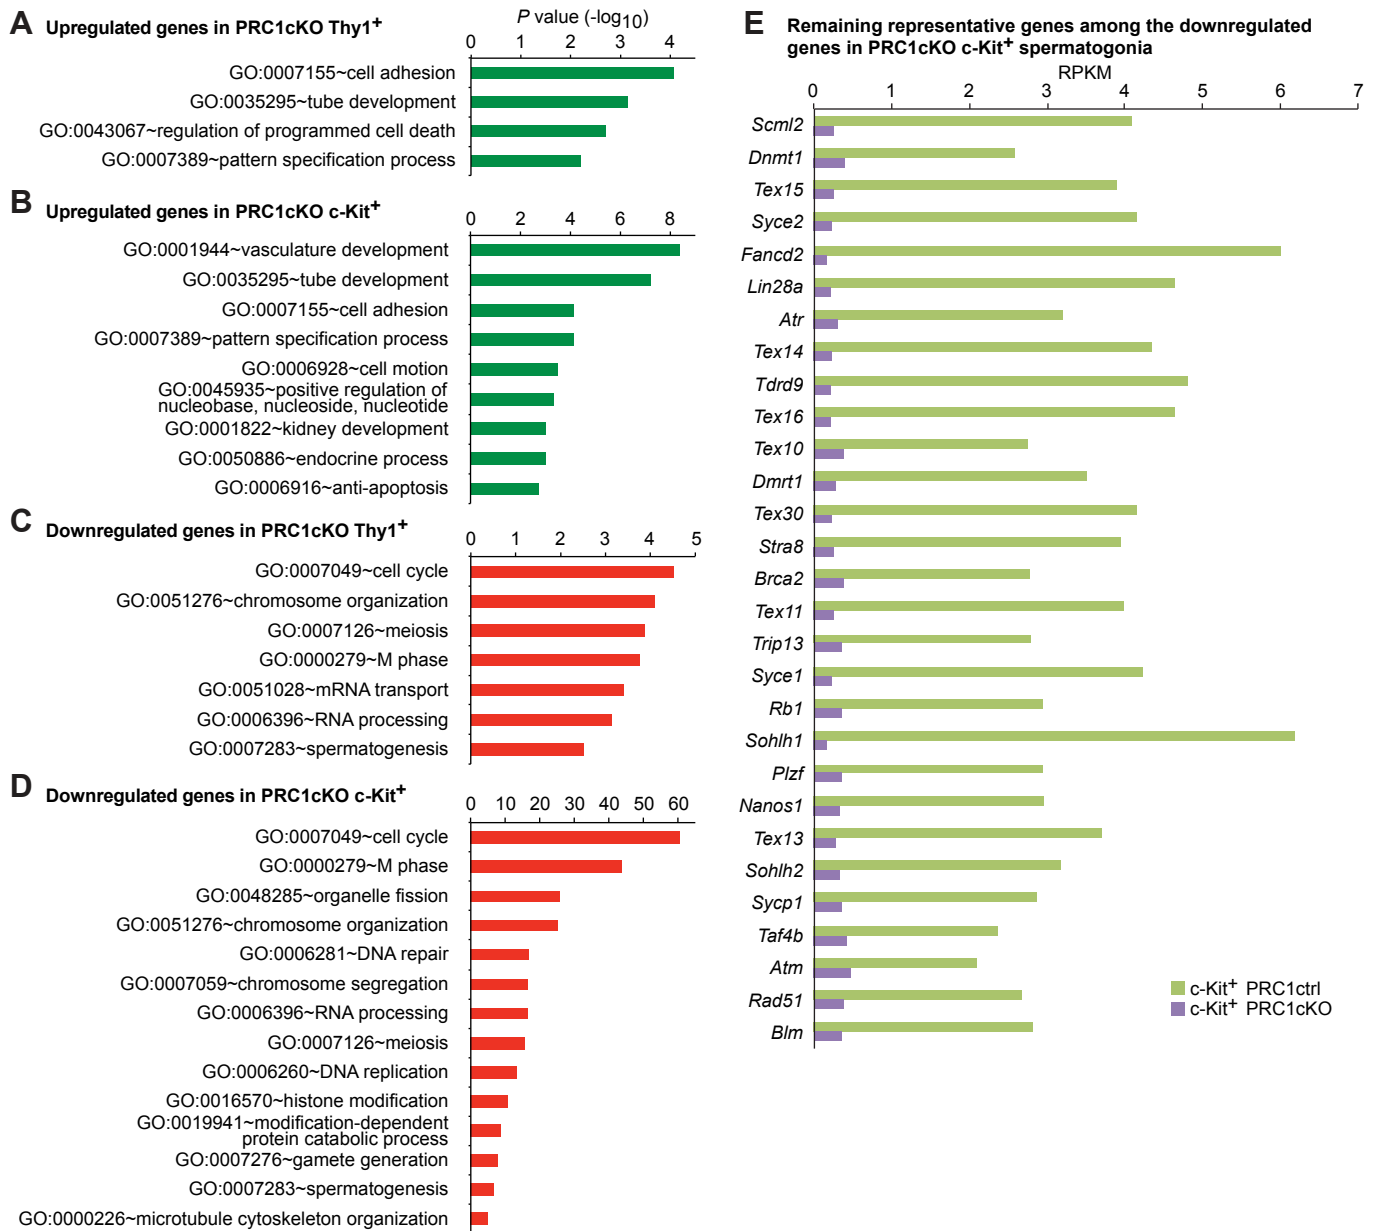

**Supplemental Figure S4. Gene ontology analysis and examples of differentially expressed genes in PRC1cKO spermatogonia.**

(A, B) Gene ontology analysis of genes upregulated in PRC1cKO spermatogonia. (C, D) Gene ontology analysis of genes downregulated in PRC1cKO spermatogonia. *P* value represents modified Fisher Exact *P* Value. (E) Expression profiles of representative genes downregulated in PRC1cKO c-Kit<sup>+</sup> spermatogonia. 15 germline genes among the top 50 downregulated genes in c-Kit<sup>+</sup> spermatogonia with the lowest *P* values are shown in Figure 2D, the remaining representative genes are shown here.

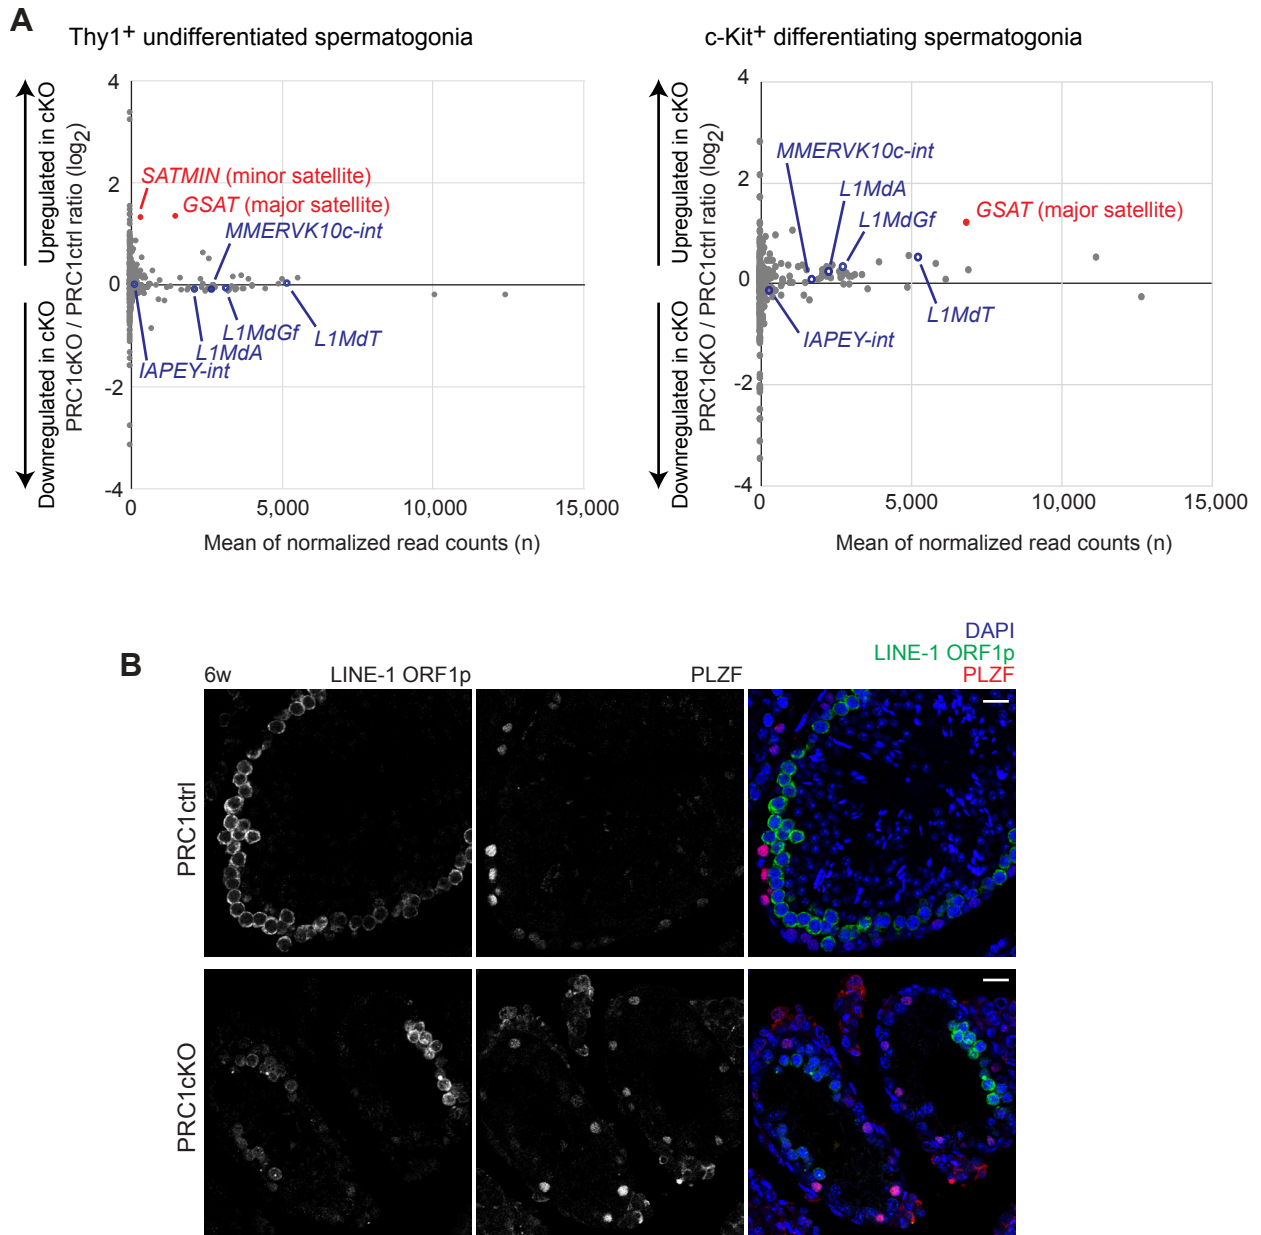

**Supplemental Figure S5. Retrotransposons were not derepressed in PRC1cKO spermatogonia.**

(A) RNA-seq analysis using Rebase. *GSAT* (major satellite) and *SATMIN* (minor satellite) were modestly derepressed in Thy1<sup>+</sup> undifferentiated spermatogonia, and *GSAT* was modestly derepressed in c-Kit<sup>+</sup> undifferentiated spermatogonia of the PRC1cKO (shown as red dots;  $P < 0.05$ , Wald test and  $> 2$  fold change). Retrotransposons such as LINE, IAP, and ERVK10c were not derepressed in PRC1cKO spermatogonia (shown as blue dots). (B) Immunostaining of testicular sections at 6 weeks (6w) with LINE1 ORF1 protein (ORF1p) and PLZF, an undifferentiated spermatogonia marker. Scale bars, 20  $\mu$ m.

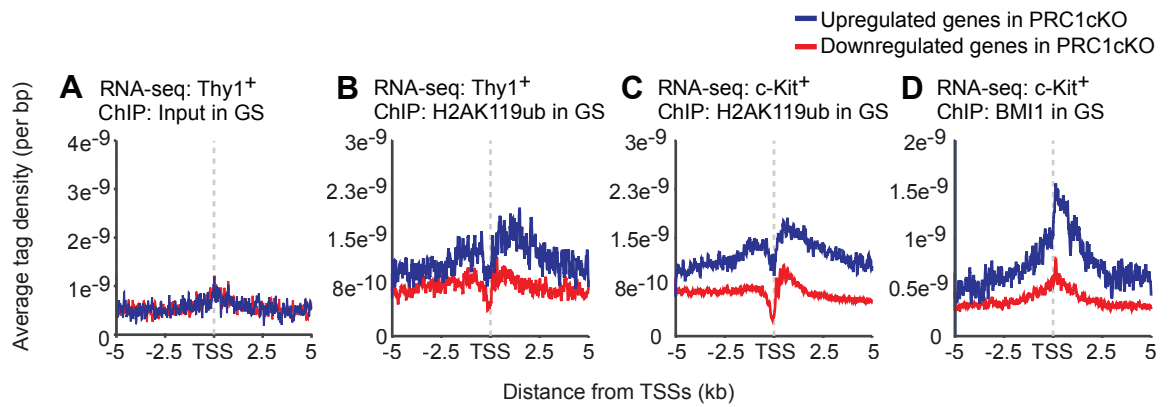

**Supplemental Figure S6. Occupancy Input, H2AK119ub, and BMI1 around TSSs in wild-type GS cells.**

(A-D) Occupancy of Input, H2AK119ub, and BMI1 around TSSs in wild-type GS cells. ChIP-seq data of GS are shown for indicated genes based on RNA-seq analyses.

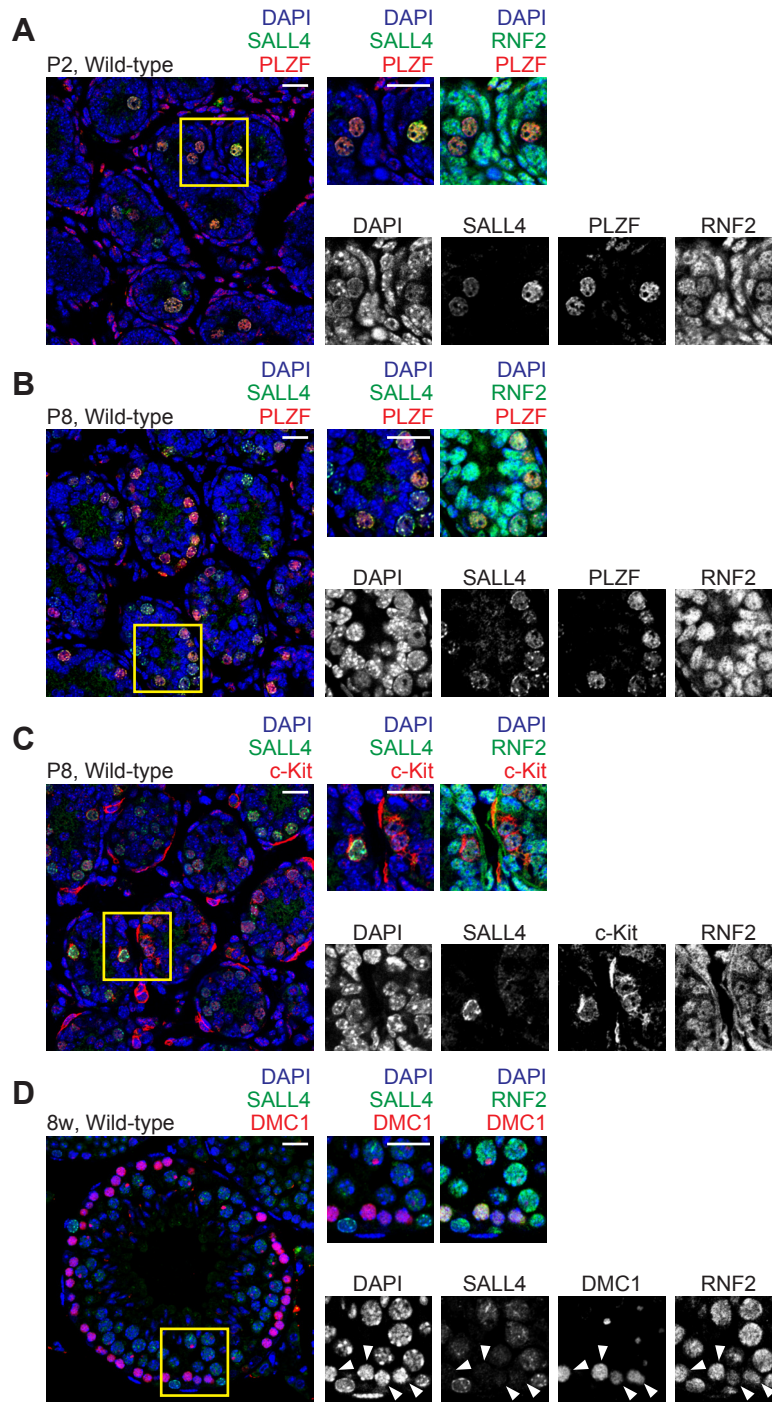

**Supplemental Figure S7. Localization of SALL4 and RNF2 during spermatogenesis.**

(A-D) Immunostaining of testicular sections at P2 (A), P8 (B, C), and 8 weeks (8w: D). DMC1-positive leptotene and zygotene spermatocytes are shown with arrowheads. Scale bars, 20  $\mu$ m. The regions with yellow squares are magnified in right panels. Scale bars in magnified panels, 20  $\mu$ m.



**A** ChIP-seq enrichment in GS or cultured Thy1<sup>+</sup> spermatogonia

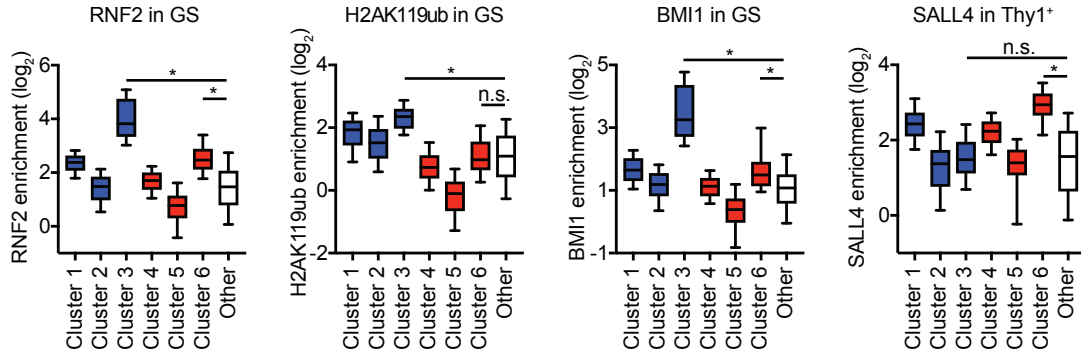

**B** Gene expression during spermatogenesis

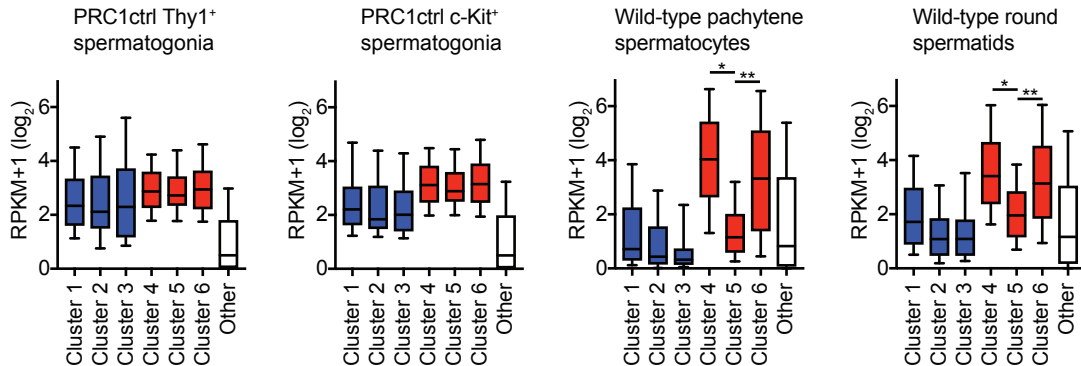

**Supplemental Figure S8. ChIP-seq enrichment and gene expression profiles of 6 clusters of genes identified by k-means clustering.**

(A) Distribution of ChIP-seq enrichment in each cluster of genes identified by k-means clustering shown in Figure 5B. “Other” represents all other genes that do not belong to these clusters. Center bars are medians; bottom and top bars are, respectively, 10% and 90% of data points; and bottom and top boxes are, respectively, 25% and 75% of data points. (B) Distribution of RNA-seq RPKM enrichment during representative stages of spermatogenesis in each cluster of genes identified by k-means clustering shown in Figure 5B. Other represents all other genes that do not belong to these clusters. \*  $P < 0.05$ , \*\*  $P < 0.001$ , unpaired t-test.

Antibody list

| Name                          | Origin                        | Applications |
|-------------------------------|-------------------------------|--------------|
| Rabbit anti-H2AK119ub         | Cell Signaling                | IHC          |
| Rat anti-GCNA                 | Abcam                         | IHC          |
| Rabbit anti-PLZF              | Santa Cruz                    | IHC          |
| Mouse anti-PLZF               | Santa Cruz                    | IHC          |
| Mouse anti- $\gamma$ H2AX     | Millipore                     | IHC          |
| Rabbit anti-SALL4             | Abcam                         | IHC, IP      |
| Guinea Pig anti-H1T           | Gift from Dr. Mary Ann Handel | IHC          |
| Goat anti-c-Kit               | R&D systems                   | IHC          |
| Mouse anti-RNF2               | MBL                           | IHC, IP      |
| Rabbit anti-Ki67              | Millipore                     | IHC          |
| Rabbit anti-phospho-H3        | Cell Signaling                | IHC          |
| Rabbit anti-LINE1-ORF1p       | Gift from Dr. Alex Bortvin    | IHC          |
| Goat anti-DMC1                | Santa Cruz                    | IHC          |
| Rabbit anti-Cleaved Caspase-3 | Cell Signaling                | IHC          |
